# Supplementary material
Source: Springer Nature journal article supplement (https://www.springermedizin.de/resource/supplementary/13024_2010_176_MOESM1_ESM.pdf/9643590)

A

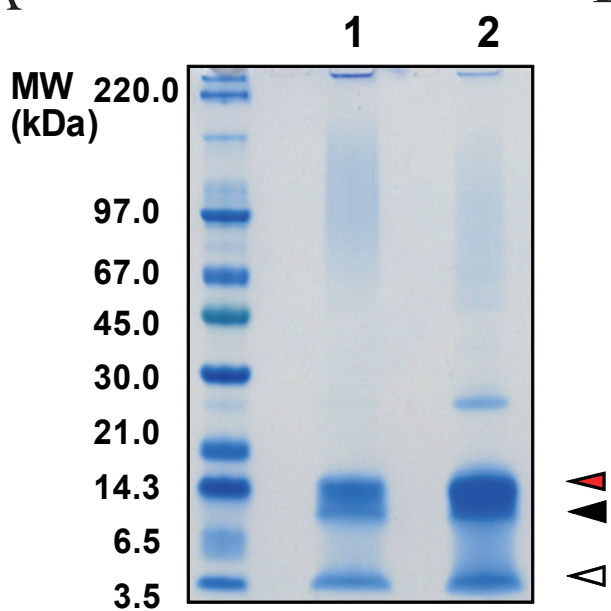

B

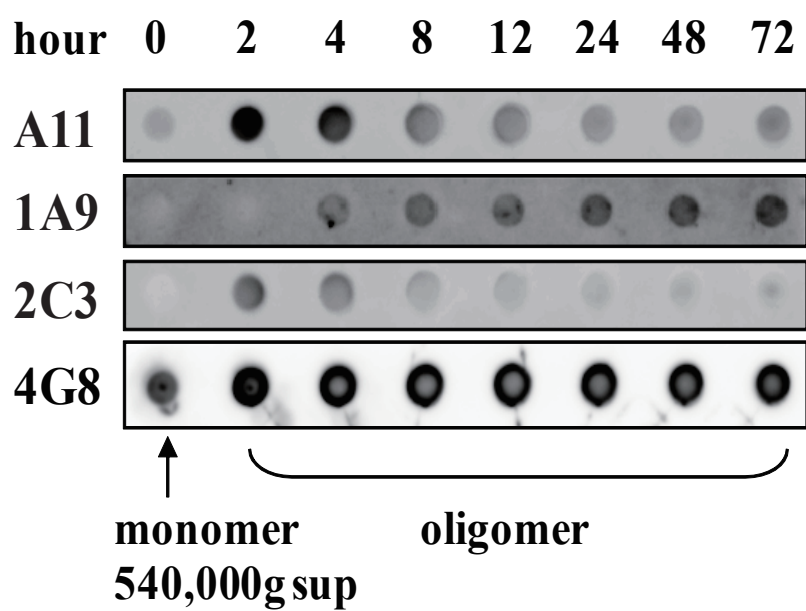

C

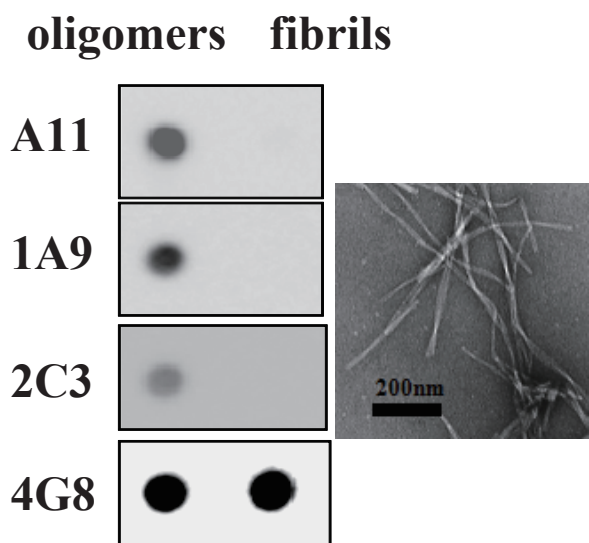

D

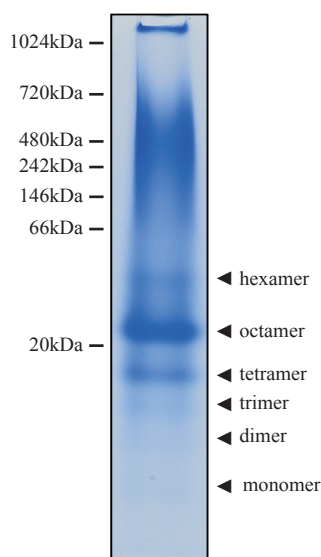

E

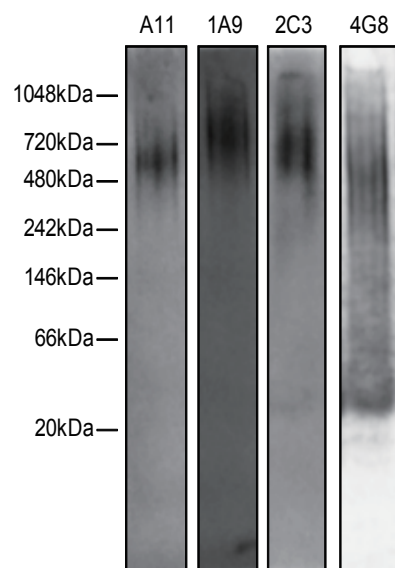

F

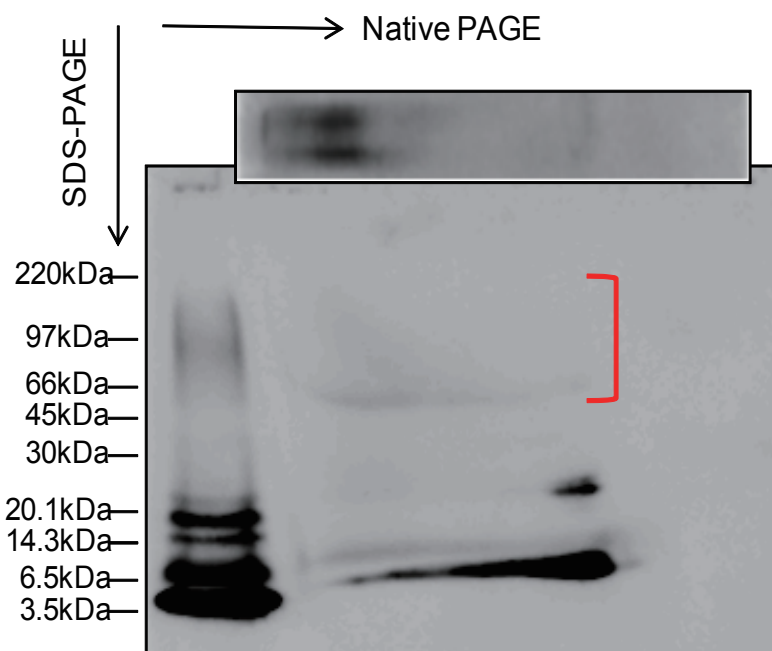

G

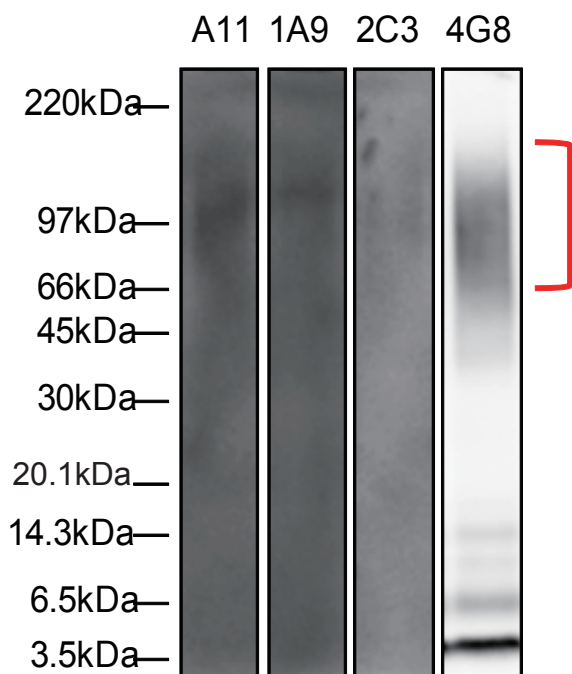

Supplement: MOESM1 [file 9643590]
